**Title: Preservation of eye movements in Parkinson's disease is stimulus and task specific**

**Abbreviated Title:** Preservation of eye movements in Parkinson's disease

**Author names and affiliations:** Jolande Fooken<sup>1,2\*</sup>,  
Pooja Patel<sup>2</sup>,  
Christina B. Jones<sup>5</sup>,  
Martin J. McKeown<sup>3,4,5</sup>,  
Miriam Spering<sup>2,3,4,6</sup>

<sup>1</sup> Centre for Neuroscience Studies, Queen's University, Kingston, ON, Canada

<sup>2</sup> Ophthalmology & Visual Sciences, University of British Columbia, Vancouver, BC, Canada

<sup>3</sup> Graduate Program in Neuroscience, University of British Columbia, Vancouver, BC, Canada

<sup>4</sup> Djavad Mowafaghian Center for Brain Health, University of British Columbia, Vancouver, BC, Canada

<sup>5</sup> Medicine, Division of Neurology, University of British Columbia, Vancouver, BC, Canada

<sup>6</sup> Institute for Computing, Information and Cognitive Systems, University of British Columbia, Vancouver, BC, Canada

\*Corresponding author:

Jolande Fooken  
Centre for Neuroscience Studies,  
Botterell Hall  
18 Stuart Street  
Kingston, ON, K7L3N6, Canada  
Email: [jolande.fooken@queensu.ca](mailto:jolande.fooken@queensu.ca)

Number of pages: 36 pages

Number of figures & tables: 7 figures & 5 tables

Number of words: Abstract (232 words), Significance Statement (119 words), Introduction (634 words), Discussion (1770)

Conflict of interest: The authors declare no competing financial interests.

Acknowledgements: This work was supported by a Deutsche Forschungsgemeinschaft (DFG) Research Fellowships to JF (grant FO 1347/1-1) and an NSERC Discovery Grant and Accelerator Supplement to MS. The authors thank members of the Spering lab for feedback on the manuscript.

Author contribution: JF, MJM, and MS conceived the presented idea. PP and CBJ recruited participants and carried out the experiment. PP preprocessed the data. JF developed and applied analytical methods and JF, MJM and MS interpreted the results. JF and MS wrote the manuscript. All authors discussed the results and contributed to the final manuscript.

## Abstract

1            Parkinson's disease (PD) is a neurodegenerative disease that includes motor impairments  
2            such as tremor, bradykinesia, and postural instability. Although eye movement deficits are  
3            commonly found in saccade and pursuit tasks, preservation of oculomotor function has also been  
4            reported. Here we investigate specific task and stimulus conditions under which oculomotor  
5            function in PD is preserved. Sixteen PD patients and eighteen healthy, age-matched controls  
6            completed a battery of movement tasks that included stationary or moving targets eliciting reactive  
7            or deliberate eye movements: pro-saccades, anti-saccades, visually-guided pursuit, and rapid  
8            go/no-go manual interception. Compared to controls, patients demonstrated systematic  
9            impairments in tasks with stationary targets: pro-saccades were hypometric and anti-saccades were  
10            incorrectly initiated toward the cued target in about 35% of trials compared to 14% errors in  
11            controls. In patients, task errors were linked to short latency saccades, indicating abnormalities in  
12            inhibitory control. However, patients' eye movements in response to dynamic targets were  
13            relatively preserved. PD patients were able to track and predict a disappearing moving target and  
14            make quick go/no-go decisions as accurately as controls. Patients' interceptive hand movements  
15            were slower on average but initiated earlier, indicating adaptive processes to compensate for motor  
16            slowing. We conclude that PD patients demonstrate stimulus- and task-dependency of oculomotor  
17            impairments and propose that preservation of eye and hand movement function in PD is linked to  
18            a separate functional pathway through the SC-brainstem loop that bypasses the fronto-basal  
19            ganglia network.

## Significance Statement

20 Eye movements are a promising clinical tool to aid in the diagnosis of movement disorders  
21 and to monitor disease progression. Although Parkinson's disease (PD) patients show some  
22 oculomotor abnormalities, it is not clear whether previously-described eye movement impairments  
23 are task specific. We assessed eye movements in PD under different visual (stationary vs. moving  
24 targets) and movement (reactive vs. deliberate) conditions. We demonstrate that PD patients are  
25 able to accurately track moving objects but make inaccurate eye movements towards stationary  
26 targets. The preservation of eye movements towards dynamic stimuli might enable patients to  
27 accurately act upon the predicted motion path of the moving target. These results can inform the  
28 development of tools for the rehabilitation or maintenance of functional performance.

## **Preservation of eye movements in Parkinson's disease is stimulus and task specific**

29 Eye movements are increasingly used as a clinical tool to enable earlier diagnosis (Marx et  
30 al., 2012; De Vos et al., 2020) and to assess disease progression and treatment effects (Patel et al.  
31 2019) in patients with Parkinson's disease (PD). Cardinal motor symptoms in PD patients include  
32 tremor, bradykinesia, and postural instability, but also impairments of oculomotor function  
33 (Armstrong, 2008; 2015). Eye movement deficits are especially prevalent when tasks involve  
34 higher-level cognitive processing or deliberation, such as remembering the motion path of a target  
35 (memory-based pursuit; Fukushima et al., 2015), anticipating or predicting a future sensory event  
36 (predictive pursuit; Helmchen et al., 2012; Fukushima et al., 2017), representing more than one  
37 concurrent movement goal (double-step task; Bhutani et al., 2013), or exerting executive control  
38 over a movement or task (anti-saccades; Chan et al., 2005; Amador et al., 2006). Moreover, PD  
39 patients show executive task-dependent deficits, for example, when selecting a target amongst a  
40 stream of temporally competing distractors (Zokaei et al., 2020), a process that requires  
41 suppressing distracting information, akin to the anti-saccade task.

42 Many of the fundamental action-regulating functions required for higher-level tasks are  
43 mediated to some degree by the basal ganglia (Jenkinson and Brown, 2011; Noorani and  
44 Carpenter, 2014), a brain region profoundly affected by degeneration of dopaminergic neurons in  
45 the substantia nigra in PD patients (Albin et al., 1989). Aside from their role in oculomotor control  
46 (Hikosaka et al., 2000), the basal ganglia might act as a gateway to sensory and memory function  
47 (McNab and Klingberg, 2008), as a performance mediator (Thura and Cisek, 2017), and as a key  
48 structure involved in sensory evidence accumulation (Perugini et al., 2018) and cancelation of  
49 impending actions (Noorani and Carpenter, 2014). Dopaminergic cortical-basal ganglia circuits

50 are implicated in sensory and cognitive deficits in PD patients, especially in situations that require  
51 decision making (Perugini et al, 2018).

52 Despite systematic movement deficits, there appears to be some preservation of motor  
53 function in PD patients. For example, “Kinesia Paradoxa” refers to the clinical phenomenon that  
54 PD patients perform selected sensory-driven motor tasks with near-normal ability, despite general  
55 motor slowing (Glickstein and Stein, 1991; Duysens et al., 2021). In the oculomotor domain,  
56 preserved functions include the latency of visually-guided saccades (Briand et al., 1999; Chan et  
57 al., 2005) and the initiation of visually-driven smooth pursuit (Fukushima et al., 2015)—functions  
58 that are driven by external, visual stimulation (as opposed to self-generated). During reaching, PD  
59 patients are able to reach for a moving ball as quickly as controls, but they are impaired when  
60 asked to make a self-generated reach for a stationary ball (Majsak et al., 1998). Preserved functions  
61 are also found when a movement trajectory has to be corrected online to account for a displacement  
62 of the movement target—a task that requires a sense of urgency (Desmurget et al., 2004).  
63 Congruently, PD patients performed corrective saccades at a comparable level to healthy controls  
64 in a saccade double-step task (Merritt et al., 2017), although they also exhibited a larger number  
65 of averaging saccades (Bhutani et al., 2013).

66 To investigate the accuracy, variability, and preservation of oculomotor functions across  
67 different stimuli and task demands, we tested 16 PD patients and 18 healthy, age-matched controls  
68 on a battery of movement tasks—pro-saccades, anti-saccades, visually-guided pursuit, and a rapid  
69 go/no-go manual interception task. In these tasks, participants viewed either stationary or moving  
70 stimuli that elicited reactive or deliberate eye movements (**Figure 1**). The different combinations  
71 of stimulus property (stationary vs. moving) and eye movement response (reactive vs. deliberate)  
72 allows us to investigate similarities and differences in saccade and pursuit deficiencies as a

73 function of stimulus and task. PD patients showed systematic impairments in tasks that involved  
74 stationary targets, indicating impaired saccade inhibition. By contrast, eye and hand movements  
75 to moving targets were generally preserved in PD patients as compared to controls.

|          |            | movement           |                      |
|----------|------------|--------------------|----------------------|
|          |            | reactive           | deliberate           |
| stimulus | stationary | pro-saccades       | anti-saccades        |
|          | moving     | sinusoidal pursuit | track-intercept task |

76 **Figure 1.** Stimulus characteristics and movement requirements in a battery of oculomotor tasks.

## METHODS

### 77 Participants

78 Participants were 16 patients with mild to moderate Parkinson’s disease (Hoehn and Yahr  
79 1-2; Goetz et al., 2004) and 18 healthy, age- and sex-matched controls (see **Table 1**). Inclusion  
80 criteria for all participants were visual acuity of 20/50 or better, no history of psychiatric or other  
81 neurologic disease, including no concussion within the past two years, no history of ocular motility  
82 abnormality, and normal cognitive function (Montreal Cognitive Assessment, MoCA, score of 25  
83 or higher). To ensure near-normal visual acuity, all participants were tested using the Early  
84 Treatment of Diabetic Retinopathy Study (ETDRS) chart at a 4-m distance (Original Series Chart  
85 “R”; Precision Vision, La Salle, IL, USA). Participants with corrective lenses were asked to wear  
86 their glasses or contact lenses during testing. All participants confirmed that they were able to  
87 clearly see the visual targets. Patients were recruited through the UBC Pacific Parkinson’s  
88 Research Centre and affiliated clinical offices and were diagnosed by a neurologist. Controls were  
89 recruited from the community. Patients were tested twice, on two different days, once whilst on  
90 medication (Levodopa or equivalent; **Table 1**), within two hours of last dose intake, once off

91 medication, after overnight withdrawal of dopaminergic withdrawal; controls were tested once.  
92 Testing order for patients (on vs. off medication) was randomized. All experimental procedures  
93 were aligned with the Declaration of Helsinki and approved by the University of British Columbia  
94 Clinical Research Ethics board; participants gave written informed consent.

**Table 1.** Characteristics of study participants

| Subject Code | Age       | Handed-ness | Sex | ETDRS*      | MoCA†    | Disease Duration (years) | Hoehn-Yahr Stage (0-5)§ | UPDRS Score (0-132)‡ | Dominant Arm Rigidity (0-4) | Test Order | Combination Levodopa   (mg) |
|--------------|-----------|-------------|-----|-------------|----------|--------------------------|-------------------------|----------------------|-----------------------------|------------|-----------------------------|
| P23          | 67        | RH          | M   | 20/40-2     | 27       | 3                        | 2                       | 44                   | 2                           | N/A        | 0                           |
| P24          | 78        | RH          | F   | 20/25-1     | 27       | 6                        | 2                       | 44                   | 1                           | ON/OFF     | 750                         |
| P26          | 84        | RH          | M   | 20/25-1     | 24       | 14                       | 2                       | 49                   | 3                           | ON/OFF     | 2250                        |
| P29          | 71        | RH          | M   | 20/20       | 27       | 8                        | 2                       | 48                   | 3                           | ON/OFF     | 1625                        |
| P30          | 61        | RH          | F   | 20/16-2     | 30       | 9.5                      | 2                       | 35                   | 1                           | ON/OFF     | 812.5                       |
| P31          | 67        | RH          | M   | 20/16-2     | 27       | 0.5                      | 2                       | 34                   | 3                           | ON/OFF     | 687.5                       |
| P32          | 61        | RH          | M   | 20/16-1     | 28       | 8                        | 2                       | 40                   | 2                           | ON/OFF     | 2000                        |
| P34          | 65        | RH          | M   | 20/25-1     | 27       | 4                        | 2                       | 14                   | 1                           | ON         | 1000                        |
| P35          | 78        | RH          | F   | 20/50-2     | 27       | 16                       | 2                       | 39                   | 2                           | ON         | 1625                        |
| P36          | 67        | RH          | M   | 20/20-1     | 26       | 10                       | 2                       | 15                   | 0                           | ON/OFF     | 1000                        |
| P37          | 65        | RH          | M   | 20/25-1     | 28       | 20                       | 2                       | 29                   | 2                           | ON/OFF     | 750                         |
| P38          | 58        | RH          | F   | 20/20       | 27       | 25                       | 3                       | 54                   | 2                           | ON         | 1000                        |
| P43          | 72        | RH          | M   | 20/25-2     | 28       | 5                        | 2                       | 18                   | 2                           | ON/OFF     | 1187.5                      |
| P44          | 58        | RH          | M   | 20/20-1     | 30       | 4                        | 2                       | 36                   | 2                           | ON/OFF     | 937.5                       |
| P45          | 41        | RH          | F   | 20/12.5-1   | 30       | 3                        | 2                       | 21                   | 2                           | ON/OFF     | 800                         |
| P49          | 70        | RH          | M   | 20/20-1     | 26       | 13                       | 2                       | 8                    | 0                           | ON         | 1875                        |
| Mean ± SD    | 66.4±9.9  |             |     | 20/22-1±0.2 | 27.4±1.6 | 9.71±7.0                 | 2.1±0.3                 | 33±13.9              | 1.75±0.9                    |            | 1143.8±584.0                |
| C25          | 74        | RH          | M   | 20/25-1     | 26       |                          |                         |                      |                             |            |                             |
| C27          | 81        | RH          | F   | 20/16-2     | 28       |                          |                         |                      |                             |            |                             |
| C28          | 60        | RH          | M   | 20/32-1     | 25       |                          |                         |                      |                             |            |                             |
| C39          | 68        | LH          | F   | 20/20-1     | 28       |                          |                         |                      |                             |            |                             |
| C40          | 64        | RH          | F   | 20/20-1     | 30       |                          |                         |                      |                             |            |                             |
| C41          | 61        | LH          | M   | 20/25       | 27       |                          |                         |                      |                             |            |                             |
| C42          | 69        | RH          | M   | 20/16-1     | 29       |                          |                         |                      |                             |            |                             |
| C46          | 62        | RH          | M   | 20/16-2     | 29       |                          |                         |                      |                             |            |                             |
| C47          | 61        | RH          | M   | missing     | 29       |                          |                         |                      |                             |            |                             |
| C48          | 74        | LH          | M   | 20/12.5-2   | 28       |                          |                         |                      |                             |            |                             |
| C50          | 69        | RH          | F   | 20/20-1     | 26       |                          |                         |                      |                             |            |                             |
| C51          | 78        | RH          | M   | 20/20-2     | 26       |                          |                         |                      |                             |            |                             |
| C52          | 71        | RH          | M   | 20/25-1     | 28       |                          |                         |                      |                             |            |                             |
| C53          | 69        | RH          | M   | 20/16-1     | 29       |                          |                         |                      |                             |            |                             |
| C54          | 79        | RH          | M   | 20/20       | 30       |                          |                         |                      |                             |            |                             |
| C55          | 88        | RH          | M   | 20/25       | 28       |                          |                         |                      |                             |            |                             |
| C56          | 65        | RH          | M   | 20/50-1     | 30       |                          |                         |                      |                             |            |                             |
| C57          | 43        | RH          | F   | 20/20       | 30       |                          |                         |                      |                             |            |                             |
| Mean ± SD    | 68.7±10.0 |             |     | 20/22±0.2   | 28.1±1.6 |                          |                         |                      |                             |            |                             |

96 \* Early Treatment of Diabetic Retinopathy (ETDRS) visual acuity chart “R” (Precision Vision).

97 † Montreal Cognitive Assessment, a test that rates cognitive ability on a scale from 0 to 30 (Nasreddine et al. 2005)

98 § Hoehn and Yahr (1967) staging scale for symptom severity, ranging from 1 (unilateral involvement only) to 5 (confinement to bed or wheelchair).

99 ‡ Unified Parkinson’s Disease Rating Scale (Movement Disorder Society Task Force 2003). Motor Score only.

100 || Most patients were on combination drugs containing Levodopa and Carbidopa (e.g., Sinemet, Levocarb). Table states total daily dose in milligram (mg) across equivalent  
101 combination drugs.



## 102 Visual Display and Apparatus

103 Stimuli were back-projected onto a translucent screen with a PROPixx video projector  
104 (VPixx Technologies, Saint-Bruno, QC, Canada; refresh rate 60 Hz, resolution 1,280 (horizontal)  
105  $\times$  1,024 (vertical) pixels. The displayed window was 40.7 (horizontal)  $\times$  33.3 (vertical) cm or 67  
106 degrees of visual angle [ $^{\circ}$ ]  $\times$  60 $^{\circ}$  in size. Stimulus display and data collection were controlled by  
107 a PC (NVIDIA GeForce GT 430 graphics card) and the experiment was programmed in MATLAB  
108 7.1 using Psychtoolbox 3.0.8 (Brainard 1997; Kleiner et al. 2007; Pelli 1997). Participants were  
109 seated in a dimly-lit room at 46 cm distance from the screen with their head supported by a  
110 combined chin and forehead rest.

## 111 Saccade and pursuit tasks

112 Participants first performed a pro- and anti-saccade task (Munoz and Everling, 2004),  
113 designed to test saccade control at different levels of deliberation (**Fig. 1**). Pro and anti-saccade  
114 targets were presented on a black background (0.06 cd/m<sup>2</sup>). The pro-saccade task (**Fig. 2A**) started  
115 with a green fixation square (0.8 $^{\circ}$  side length; 69.7 cd/m<sup>2</sup>) shown at the screen centre; eye tracker  
116 drift correction was performed during initial fixation. At the same time as the fixation square, two  
117 white target squares (each 0.8 $^{\circ}$ ; 96.5 cd/m<sup>2</sup>) were presented in the periphery, at 12 $^{\circ}$  to the left and  
118 right of fixation. After a random fixation period (0.8-1.2 s) an open square (1.2 $^{\circ}$  side length)  
119 appeared around one of the white target squares, indicating the side to which participants should  
120 move their eyes. The offset of the green fixation square served as a cue to initiate a saccade toward  
121 the target. The anti-saccade task (**Fig. 3A**) followed the same timeline, except that here, the fixation  
122 square was red (0.8 $^{\circ}$  side length; 21.6 cd/m<sup>2</sup>), and the open square marked the distractor, i.e.,  
123 participants had to look away from it and toward the uncued target. Each participant completed 40  
124 trials of each task.

125 Participants next performed a baseline smooth pursuit tracking task. This task was designed  
126 to characterise basic tracking function akin to testing pursuit at the bedside by regularly moving a  
127 small object to-and-fro at different speeds before the patient's eyes (Leigh and Zee, 2015). Each  
128 trial started with a drift correction (fixation on a central bull's eye stimulus  $2^\circ$  in diameter). The  
129 smooth pursuit target was a small ( $2^\circ$  in diameter) black disk presented on a grey background with  
130 a luminance of 97.6 candela per meter squared ( $\text{cd}/\text{m}^2$ ). The target moved sinusoidally for five  
131 repetitions at  $16^\circ/\text{s}$  or  $32^\circ/\text{s}$ , first along the horizontal and then along the vertical meridian (**Fig.**  
132 **5A**). Reflection points were positioned at  $\pm 16^\circ$  to the left/right or top/down and each speed was  
133 presented once per motion direction resulting in 4 trials per participant.

#### 134 Track-intercept task

135 In the second part of testing, participants performed a timed go/no-go task, in which they  
136 had to track and manually intercept a moving target that followed a linear-diagonal path and either  
137 hit or missed a dedicated strike box (**Fig. 6A**). The moving target was a black Gaussian dot ( $SD =$   
138  $0.4^\circ$ ;  $d = 2^\circ$ ;  $5.4 \text{ cd}/\text{m}^2$ ) presented on a gray background ( $35.9 \text{ cd}/\text{m}^2$ ). The strike box ( $31.5 \text{ cd}/\text{m}^2$ )  
139 was  $6^\circ \times 10^\circ$  in size and offset by  $12^\circ$  from the center to the side of interception. Importantly, the  
140 target was only shown for 300 or 500 ms and then disappeared. Participants had to predict whether  
141 the target would pass or miss the strike box by following the target's assumed trajectory even after  
142 it had disappeared. They were asked to intercept the target while it was in the strike box in pass  
143 trajectories, and withhold a hand movement in miss trajectories. Each interception started from a  
144 table-fixed position and was made with the index finger of the dominant hand. Stimulus velocity  
145 followed natural forces (gravity, drag force, Magnus force; Fooker and Sperling, 2019). The target  
146 launched at an angle of  $5^\circ$ - $12^\circ$ , depending on the type of trajectory, and moved at a speed of either  
147  $13$  or  $17^\circ/\text{s}$ ; conditions were presented in randomized order. Each trial ended when participants

148 either intercepted the target or when the target reached the edge of the screen (2-2.6 s). At the end  
149 of each trial participants received performance feedback; target end position was shown, and  
150 correct or incorrect decisions were indicated. Each participant performed a familiarization session  
151 (8 trials; full trajectory visible) followed by 120 experimental trials in which the target viewing  
152 time was limited.

### 153 Eye and hand movement recordings and preprocessing

154 Eye position of the right eye was recorded with a video-based eye tracker (Eyelink 1000  
155 tower mount; SR Research Ltd., Ottawa, ON, Canada) at a sampling rate of 1000 Hz. Eye  
156 movements were analyzed off-line using custom-made routines in MATLAB (R2015a). Eye  
157 velocity profiles were filtered using a low-pass, second-order Butterworth filter with cut-off  
158 frequencies of 15 Hz (position) and 30 Hz (velocity). Saccades were detected based on a combined  
159 velocity and acceleration criterion: five consecutive frames had to exceed a fixed velocity criterion  
160 of 30°/s; saccade on- and offsets were then determined as acceleration minima and maxima,  
161 respectively. Saccades were excluded from smooth pursuit analysis. Pursuit onset was detected in  
162 individual traces using a piecewise linear function that was fit to the filtered position trace.

163 Finger position was recorded with a magnetic tracker (3D Guidance trakSTAR, Ascension  
164 Technology Corp., Shelburne, VT, USA) at a sampling rate of 60 Hz; a lightweight sensor was  
165 attached to the participant's dominant hand's index fingertip with a small Velcro strap. Finger  
166 latency was defined as the first sample in which finger velocity exceeded 5% of the finger's peak  
167 velocity. The 2D finger interception position was recorded in x- and y-screen-centered coordinates.

### 168 Eye and hand movement performance measures

169 For all eye and hand movement measures reported in the manuscript we calculated an  
170 average value per participant by finding the median value across trials. We also assessed within-

171 participant variability by calculating the standard deviation of a given measure across trials. We  
172 aimed to test patients on two separate visits when they were either on or off their medication  
173 (counterbalanced order). Four patients were unable to come in for testing while off medication and  
174 one patient did not take any medication (P23, **Table1**). For the remaining 11 patients we found no  
175 effect of medication on eye movement timing and accuracy (e.g., saccade amplitude,  $t(23.5)=3.90$ ,  
176  $p<.001$ , in the pro-saccade task or on sensorimotor decision accuracy,  $t(24.9)=1.26$ ,  $p=.22$ ).  
177 Because patients generally had noisier data than controls we had a higher rate of trial exclusions  
178 in patients (see below). Therefore, we decided to pool data from both test days for all patients who  
179 came in twice (unless reported otherwise). To ensure that unequal trial numbers across participants  
180 did not affect our main results we repeated each analysis using only data from the first visit. These  
181 results did not statistically differ from the results reported here.

182 Saccade performance in the pro- and anti-saccade task was quantified by calculating  
183 saccade latency, velocity, duration, and amplitude. Saccade latency was defined as the difference  
184 between target cue and first saccade onset. Saccades with a latency of  $<150$  ms were defined as  
185 express saccades (Fischer, 1987). We then determined the velocity, duration, and 2D amplitude of  
186 this initial saccade. For the anti-saccade task, we also calculated the number of direction errors  
187 (i.e., saccades directed to the cued rather than uncued target and not later corrected) and the number  
188 of changes of mind (i.e., saccades initially directed to the cued target, but then corrected to the  
189 uncued target).

190 Smooth pursuit accuracy was quantified by calculating pursuit latency, gain, position error,  
191 and saccade rate. Pursuit latency was defined as the time difference between stimulus onset and  
192 pursuit onset. If no pursuit was initiated and participants fixated until initiating a saccade, pursuit  
193 onset was defined as the offset of that first saccade. The rate of catch-up saccades was defined as

194 the average number of saccades per second across the entire trial. Pursuit gain, eye position error  
195 and catch-up saccade rate were analysed during steady-state pursuit, omitting the response within  
196 140 ms of either side of the target deflection points. Gain was defined as the mean relative  
197 difference between eye and target velocity; eye position error was defined as the 2D distance  
198 between eye and target position. Pursuit gain and eye position error were calculated during smooth  
199 tracking (excluding saccades and blinks).

200 For the track-intercept task we calculated pursuit latency, initial eye velocity, horizontal  
201 position error and saccade rate while the target was visible (300 or 500 ms), and the latency of the  
202 first catch-up saccade. For the finger, we analyzed finger latency, peak velocity, interception  
203 timing error, and positional interception error. Finger latency was defined as the difference  
204 between target onset and finger movement onset. Interception timing error was calculated by  
205 dividing the distance between the target and the point of interception by the average target velocity.  
206 Positional interception error was calculated as the 2D error between target position and hand  
207 position at time of interception. To calculate hand movement speed adjustment within an  
208 experimental session we used the first session for patients that were tested on and off medication.

209 All trials were manually inspected and trials, in which participants blinked during target  
210 presentation were excluded from analysing the given task. Based on inspection, we excluded one  
211 participant for the pro- and anti-saccade task because no valid eye movement data were collected.  
212 We also excluded four control subjects from the manual interception task that had more than 25%  
213 trials of eye movement signal loss. Following the same cut-off (more than 25% of invalid trials),  
214 we also excluded data from one patient on ON-medication day and data from two patients on OFF-  
215 medication day. Usable data from the respective other testing days were included in the analysis.

216 For the remaining participants, we excluded 132 trials (1%) in the pro-saccade task, 159 trials (1%)  
217 in the anti-saccade task, and 575 (12%) in the manual interception task.

### 218 Statistical analyses

219 Differences between PD patients and controls were evaluated using Welch's two-sample  
220 unpaired *t*-tests. We used Welch's *t*-tests to adjust for the variance *S* of each group of size *N*.  
221 Degrees of freedom using Welch *t*-tests are estimated as follow

$$df = \frac{\left( \frac{S_{patients}^2}{N_{patients}} + \frac{S_{controls}^2}{N_{controls}} \right)^2}{\left( \frac{S_{patients}^4}{N_{patients}^2(N_{patients} - 1)} + \frac{S_{controls}^4}{N_{controls}^2(N_{controls} - 1)} \right)} \quad (1)$$

222 Pooled group differences for saccade latency dependent intervals were compared using a Mann-  
223 Whitney test. We assessed the probability of group values being not equal (*p* value) and the *z*-  
224 Score (*z* value). A *z* value close to 0 indicates that group medians are equal. To compare  
225 oculomotor performance across tasks we calculated a linear regression and correlation coefficient.  
226 All statistical analyses were performed using R (version 4.01, R Core Team, 2017).

## RESULTS

227 Early-stage PD patients with mild to moderate symptoms and age-matched healthy controls  
228 performed a variety of movement tasks that required sensorimotor decisions at different levels of  
229 task complexity. The tasks ranged from visually guided pro- and anti-saccades, baseline smooth  
230 pursuit tracking, to rapid go/no-go manual interceptions.

### 231 Eye movements to stationary targets are impaired in PD patients

232 In the first part of the experiments, participants were instructed to quickly move their eyes  
233 either to a stationary target that was cued (pro-saccades) or to a stationary target that was located

234 opposite to a cued distractor (anti-saccades). In both tasks we found systematic differences in eye  
235 movement speed, accuracy, and variability between patients (pooled across ON and OFF  
236 medication) and controls. In the pro-saccade task (**Fig. 2A**), patients tended to undershoot the  
237 saccade target on average (i.e., saccades were hypometric), whereas controls landed on the target  
238 on average (**Fig. 2B**). Moreover, patients' saccades were slower (lower peak velocity) as compared  
239 to controls (**Table 2**). To investigate whether the velocity reduction in patients' saccades was  
240 linked to their saccade hypometria, we considered the relationship between saccade velocity and  
241 amplitude (main sequence; **Fig. 2C**). We found that patients and controls showed a positive linear  
242 relationship between saccade velocity and amplitude with comparable slopes ( $M_{patients} = 22.8 \pm 5.0$   
243  $1/s$ ;  $M_{controls} = 25.0 \pm 4.7$   $1/s$ ;  $t(32) = 1.33$ ,  $p = .19$ ). These findings indicate that slower saccades  
244 in patients could be linked to the fact that their saccades are also of smaller size. Whereas the  
245 general relationship between saccade velocity and amplitude was comparable between patients  
246 and controls, we found that patients' saccades were more variable across trials (see examples in  
247 **Fig. 2C**). This within-participant eye movement variability was reflected in significantly higher  
248 standard deviations of saccade amplitude, velocity, and latency in patients as compared to controls  
249 (**Table 3**).

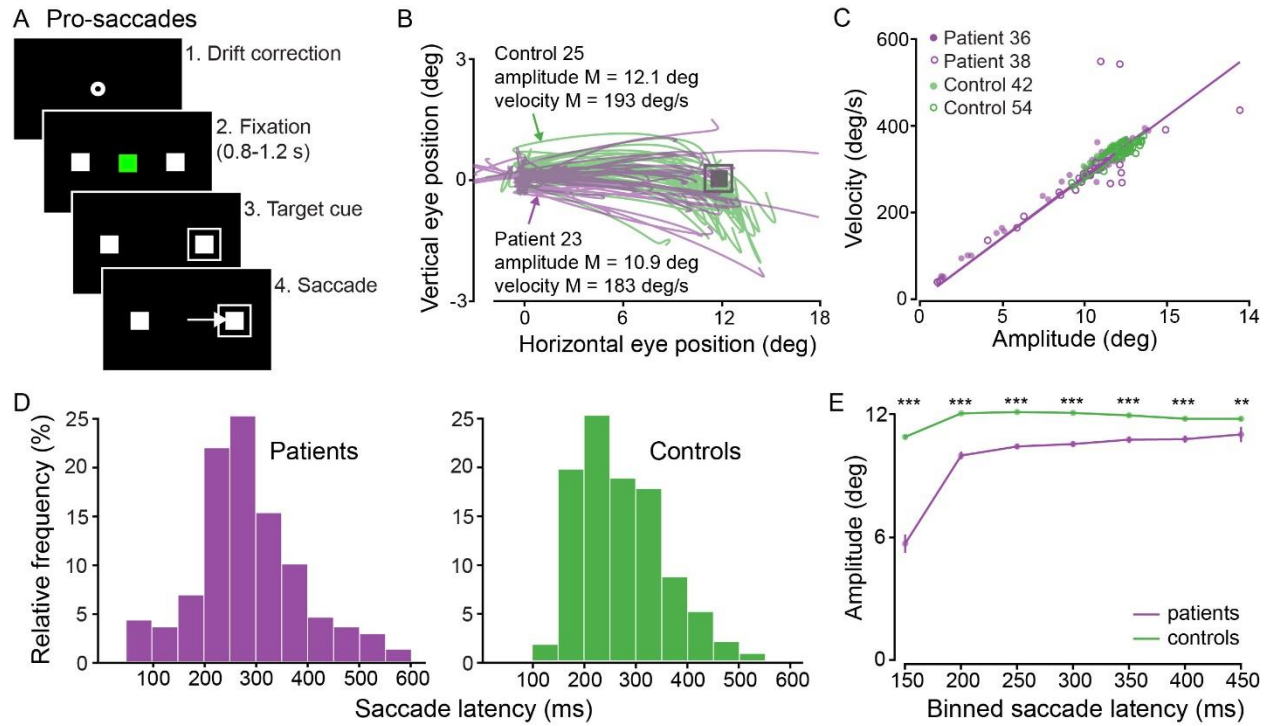

250 **Figure 2.** Sequence of events and eye movements in the pro-saccade task. (A) Each trial started  
251 with a drift correction followed by a fixation period. Participants had to saccade to the cued target  
252 square. (B) 2D eye position in pro-saccade task for a representative PD patient (purple) and control  
253 participant (green). For illustration purposes, eye and target position data were flipped to always  
254 depict the saccade target on the right. (C) Main sequence (saccade velocity vs. amplitude) for two  
255 representative patients (purple circles) and two control participants (green circles). Each circle  
256 represents one trial. (D) Saccade latency distributions (relative frequency of binned saccade  
257 latencies) for patients and controls. (E) Mean saccade amplitude as a function of saccade latency.  
258 Each dot represents the mean saccade amplitude in a 50 ms time bin across all patients (purple)  
259 and controls (green). Vertical lines indicate standard error. Asterisks denote significance level of  
260 ranked sum test: \*\*  $p < .01$  and \*\*\*  $p < .001$ .



261 **Table 2.** Saccadic eye-movement accuracy.

|                      | PD patients    | Controls       | Two-sample unpaired <i>t</i> -tests                               |
|----------------------|----------------|----------------|-------------------------------------------------------------------|
| <b>Pro-saccades</b>  |                |                |                                                                   |
| Amplitude            | 10.5 ± 1.0 deg | 12.0 ± 0.6 deg | <b><i>t</i>(25.3) = 5.17; <i>p</i> &lt; .001; <i>d</i> = 1.80</b> |
| Velocity             | 242 ± 56 deg/s | 298 ± 53 deg/s | <b><i>t</i>(31.1) = 3.00; <i>p</i> = .005; <i>d</i> = 1.03</b>    |
| Latency              | 268 ± 52 ms    | 264 ± 60 ms    | <i>t</i> (31.9) = .20; <i>p</i> = .84; <i>d</i> = .07             |
| <b>Anti-saccades</b> |                |                |                                                                   |
| Direction error      | 10.1 ± 13.4 %  | 4.2 ± 6.3 %    | <i>t</i> (20.7) = 1.60; <i>p</i> = .12; <i>d</i> = .56            |
| Changes of mind      | 24.4 ± 17.0 %  | 9.4 ± 8.4 %    | <b><i>t</i>(21.3) = 3.21; <i>p</i> = .004; <i>d</i> = 1.12</b>    |
| Amplitude*           | 12.0 ± 1.9 deg | 11.6 ± 2.8 deg | <i>t</i> (30.1) = 0.48; <i>p</i> = .64; <i>d</i> = .16            |
| Velocity*            | 247 ± 61 deg/s | 293 ± 51 deg/s | <b><i>t</i>(29.3) = 2.35; <i>p</i> = .03; <i>d</i> = .81</b>      |
| Latency              | 343 ± 76 ms    | 314 ± 80 ms    | <i>t</i> (31.8) = 1.06; <i>p</i> = .30; <i>d</i> = .36            |

262 Significant results indicated in bold.

263 \*Only trials in which participants made a saccade into the correct (uncued) direction are included.

264 In the pro-saccade task, saccade latencies ranged from 50-600 ms (**Fig. 2E**). Notably,  
 265 patients made more express saccades with latencies shorter than 150 ms compared to controls  
 266 (patients: 7.8%; controls: 1.7%). To investigate whether increased latency variability in patients  
 267 could be linked to saccade accuracy, we analyzed saccade amplitude as a function of saccade  
 268 latency at a group level. Overall, saccades were hypometric (inaccurate) in patients compared to  
 269 controls for all latency intervals (*p*<.001 and *z*>3.62 for all latencies shorter than 450 ms and  
 270 *p*=.004 and *z*=2.91 for latencies longer than 450 ms). Interestingly, hypometric saccades in patients  
 271 were particularly prominent at the shortest saccade latency interval (**Fig. 2E**). These results suggest

272 that patients might have made reflexive saccades toward the cued target before motor planning  
273 was complete.

274 **Table 3.** Saccadic eye-movement variability.

|                      | PD patients   | Controls      | Two-sample unpaired <i>t</i> -tests                               |
|----------------------|---------------|---------------|-------------------------------------------------------------------|
| <b>Pro-saccades</b>  |               |               |                                                                   |
| Amplitude            | 3.3 ± 1.5 deg | 0.8 ± 0.4 deg | <b><i>t</i>(16.9) = 6.45; <i>p</i> &lt; .001; <i>d</i> = 2.27</b> |
| Velocity             | 72 ± 34 deg/s | 29 ± 21 deg/s | <b><i>t</i>(24.4) = 4.40; <i>p</i> &lt; .001; <i>d</i> = 1.53</b> |
| Latency              | 106 ± 35 ms   | 55 ± 21 ms    | <b><i>t</i>(24.3) = 5.14; <i>p</i> &lt; .001; <i>d</i> = 1.79</b> |
| <b>Anti-saccades</b> |               |               |                                                                   |
| Amplitude*           | 3.1 ± 2.0 deg | 1.5 ± 1.2 deg | <b><i>t</i>(23.8) = 2.83; <i>p</i> = .009; <i>d</i> = 0.99</b>    |
| Velocity*            | 66 ± 44 deg/s | 30 ± 19 deg/s | <b><i>t</i>(19.8) = 3.01; <i>p</i> = .007; <i>d</i> = 1.06</b>    |
| Latency              | 115 ± 29 ms   | 73 ± 26 ms    | <b><i>t</i>(30.5) = 4.45; <i>p</i> &lt; .001; <i>d</i> = 1.53</b> |

275 Significant results indicated in bold.

276 \*Only trials in which participants made a saccade into the correct (uncued) direction are included.

277 In the anti-saccade task, participants had to inhibit a saccade response to a cued distractor  
278 location and instead make a deliberate saccade to the opposite side (**Fig. 3A**). We assessed task  
279 performance by describing two types of errors: direction errors are defined as saccades that landed  
280 on the cued target location and were not subsequently corrected. Changes of mind are defined as  
281 saccades that were initially directed to the cued target location but then corrected to the opposite  
282 side. In patients and controls, the frequency of direction errors was lower than the frequency of  
283 changes of mind, indicating that most saccades that were initially directed at the cued distractor  
284 were subsequently corrected (**Table 2**). Overall, patients made about twice as many errors as

285 controls, and were significantly more likely to change their mind as compared to controls (**Fig.**  
286 **3B; Table 2**).

287         Similar to the pro-saccade task, we observed that patients had more variable eye movement  
288 amplitudes, velocities, and latencies across trials (within-participant variability) compared to  
289 controls (**Table 3**). We compared saccade kinematics for trials in which participants correctly  
290 performed the task (excluding trials with direction errors and changes of minds). As in the pro-  
291 saccade task, patients made slower saccades than controls (**Table 2**), but anti-saccades were overall  
292 of similar amplitude in both groups of participants (**Fig. 3B**). These findings indicate that  
293 hypometria might overall be less prevalent in a task that required more deliberation and triggered  
294 longer saccade latencies as compared to a visually-cued saccade task.

295         We next evaluated task performance (correct trials, direction errors and changes of mind)  
296 as a function of saccade latency. Even though patients initiated saccades at around the same time  
297 as controls (**Table 2**), their task performance depended on saccade latencies. Shorter saccade  
298 latencies were associated with more errors (**Fig. 3C-D**), in fact, patients only made more errors  
299 than controls for saccades with latencies shorter than 300 ms ( $p < .001$  and  $z > 5.15$ ). These findings  
300 mirror the observation that short-latency pro-saccades in patients tend to be hypometric and  
301 indicate that patients' saccade task performance in generally is most impaired for short-latency  
302 saccades.

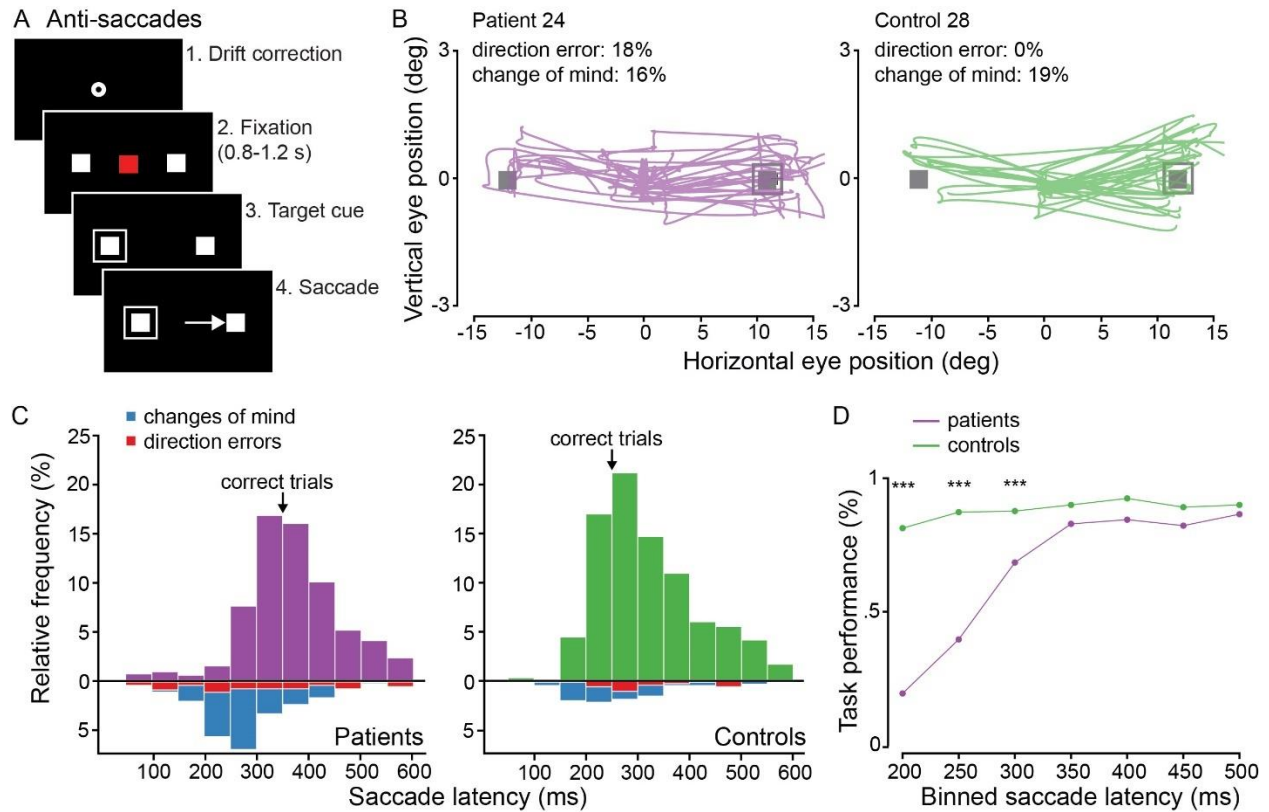

303 **Figure 3.** Sequence of events and eye movements in the anti-saccade task. (A) Each trial started  
 304 with a drift correction followed by a fixation period. Participants had to saccade to the uncued  
 305 target square. (B) 2D eye position in pro-saccade task for a representative PD patient (purple) and  
 306 control participant (green). For illustration purposes, eye and target position data were flipped to  
 307 always depict the saccade target on the right. (C) Saccade latency distributions (relative frequency  
 308 of binned saccade latencies) for patients and controls. Blue bins indicate changes of mind and red  
 309 bins indicate direction errors. (D) Task performance (percentage of saccades towards uncued  
 310 location without any corrections) as a function of saccade latency. Asterisks denote significance  
 311 level of ranked sum test: \*\*\*  $p < .001$ .

312 To directly link performance in the pro- and anti-saccade task we chose two measures that  
 313 were indicative of task performance and were related to successful saccade inhibition. For the pro-  
 314 saccade task, we calculated the percentage of express saccades participants made towards the cued  
 315 target. For the anti-saccade task, we used the frequency of task errors (direction errors and changes  
 316 of mind). We then related these performance measures across tasks. In the patient group, we found  
 317 a positive correlation ( $r = .85$ ) between express saccades in the pro-saccade task and task error rate

318 in the anti-saccade task (**Fig. 4A**). No such relationship was found in the control group. Only one  
319 control participant (C57; a highly-trained vision scientist who is one of the authors) initiated  
320 saccades with latencies shorter than 150 ms, but her task error rate was low. Comparing saccade  
321 latency distributions between C57 and a PD patient that had the same rate of express saccades  
322 (P35) illustrates a key difference. Whereas C57 has a narrow distribution of saccades centered  
323 around a latency of approximately 175 ms, P35 has an initial distribution of express saccades that  
324 peaks around 75 ms and then another wide-spread distribution of longer-latency saccades (left  
325 panel in **Fig. 4B**). The observation that the rate of express saccades during the pro-saccade task  
326 was linked to the rate of errors during the anti-saccade task in PD patients suggests that eye  
327 movements to stationary targets are controlled similarly irrespective of the level of movement  
328 deliberation.

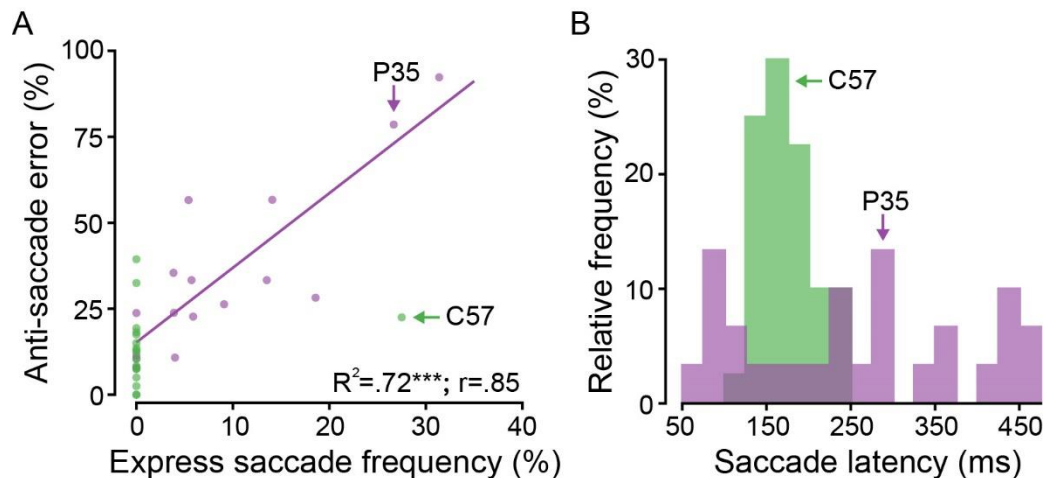

329 **Figure 4.** Comparison of pro- and anti-saccade task performance. (A) Relationship between the  
330 frequency of express saccades during the pro-saccade task and the error rate (saccade towards the  
331 cued target) in the anti-saccade task. Each circle represents a patient (purple) and control  
332 participant (green). Asterisk denotes significant regression results in patient group:  $***p < 0.001$ .  
333 (B) Saccade distributions of a control participant (C57; green) and patient (P35; purple) who had  
334 a similar rate of express saccades.

335 Eye and hand movements to moving targets are preserved in PD patients

336 Participants performed two tasks that involved moving targets. In the baseline pursuit task,  
337 participants were asked to follow a moving target with their eyes; in the go/no-go track-intercept  
338 task participants had to follow and manually intercept a moving target that disappeared after brief  
339 initial presentation. In the baseline pursuit task (**Fig. 5A**), we found that patients were able to track  
340 the moving target with similar speed and accuracy as controls (**Fig. 5B**). Even though patients  
341 made more catch-up saccades on average to keep their eyes aligned with the moving target,  
342 patients' saccades during pursuit were as accurate as controls' (comparable position error)  
343 indicating that pursuit performance was overall preserved (**Table 4**).

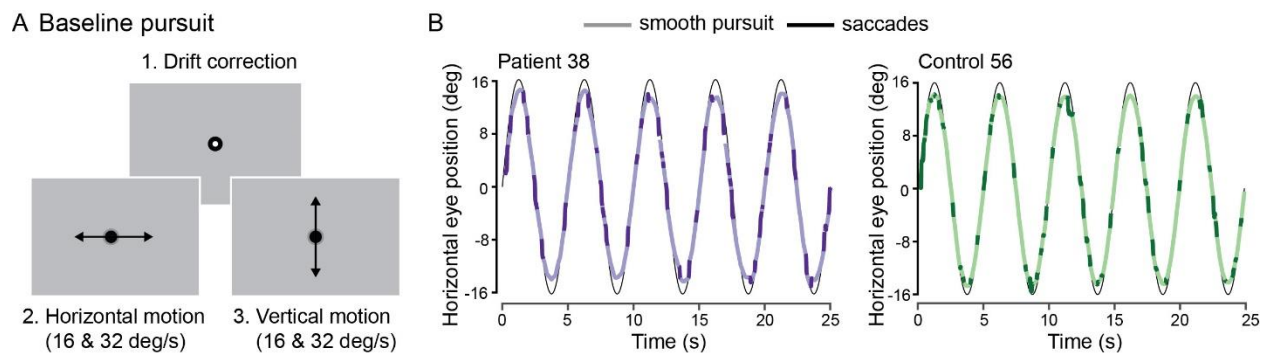

344 **Figure 5.** Sequence of events and eye movements in baseline pursuit task. (A) Each trial started  
345 with a drift correction followed by five cycles of sinusoidal target motion in either horizontal or  
346 vertical direction. (B) 2D eye position for a horizontally moving target at a speed of 16 deg/s for a  
347 representative PD patient (purple) and control participant (green). Saturated segments denote  
348 saccades, lighter segments represent smooth pursuit.

349 During the go/no-go track-intercept task, participants viewed a moving target that  
350 disappeared after 300 or 500 ms before passing through or missing an indicated strike zone (**Fig.**  
351 **6A**). In each trial, participants had to predict whether the no longer visible target would pass (go  
352 response required) or miss (no-go required). We first compared how well participants were able to  
353 track the moving target with their eyes while it was visible. Similar to baseline pursuit, we found

354 that patients' tracking was as fast and as accurate as controls' pursuit, with comparable eye velocity  
 355 and position errors (**Fig. 6B, Table 4**). However, patients initiated smooth pursuit later and made  
 356 their first catch-up saccade toward the target later than controls (**Fig. 6C**), indicating that patients  
 357 showed less anticipation of predictable target motion. Notwithstanding these differences in eye  
 358 movement timing, patients' go/no-go decision accuracy—i.e., correctly differentiating whether the  
 359 target would hit or miss the strike zone—was similar to performance in controls ( $M_{patients} = 79.2\%$ ,  
 360  $M_{controls} = 83.7\%$ ;  $t(27.7) = 1.12$ ;  $p = .27$ ;  $d = .41$ ). Because we found performance differences as  
 361 a function of saccade latency in our saccade tasks, we next analyzed go/no-go decision accuracy  
 362 on a group level as a function of the first saccade latency. We find that patients have less early  
 363 catch-up saccades compared to controls (**Fig. 6C**). However, congruent with findings in the pro-  
 364 saccade and anti-saccade tasks, patients were relatively less accurate in their go/no-go decisions  
 365 compared to controls when initial catch-up saccades were shorter than 150 ms ( $p = .004$ ;  $z = 2.92$ ).

366 **Table 4.** Eye movement accuracy during baseline pursuit and track-intercept task.

|                        | PD patients     | Controls        | Two-sample unpaired <i>t</i> -tests                                              |
|------------------------|-----------------|-----------------|----------------------------------------------------------------------------------|
| <b>Smooth pursuit</b>  |                 |                 |                                                                                  |
| Eye velocity gain      | 1.08 ± .23      | 1.01 ± .21      | $t(30.5) = .87$ ; $p = .39$ ; $d = .30$                                          |
| Position error         | 2.2 ± 1.0 deg   | 1.9 ± .7 deg    | $t(25.4) = .79$ ; $p = .44$ ; $d = .27$                                          |
| Saccade rate           | 4.6 ± 1.1 sac/s | 4.0 ± .7 sac/s  | <b><math>t(24.4) = 2.05</math>; <math>p = .05</math>; <math>d = .71</math></b>   |
| <b>Track-intercept</b> |                 |                 |                                                                                  |
| Pursuit latency        | 88 ± 48 ms      | 49 ± 51 ms      | <b><math>t(26.8) = 2.14</math>; <math>p = .04</math>; <math>d = .79</math></b>   |
| Initial eye velocity   | 5.8 ± 1.6 deg/s | 6.1 ± 1.6 deg/s | $t(27.2) = .46$ ; $p = .65$ ; $d = .17$                                          |
| Position error         | 1.3 ± .3 deg    | 1.2 ± .3 deg    | $t(26.1) = 1.47$ ; $p = .15$ ; $d = .54$                                         |
| Saccade latency        | 275 ± 32 ms     | 241 ± 26 ms     | <b><math>t(27.9) = 3.18</math>; <math>p = .004</math>; <math>d = 1.16</math></b> |

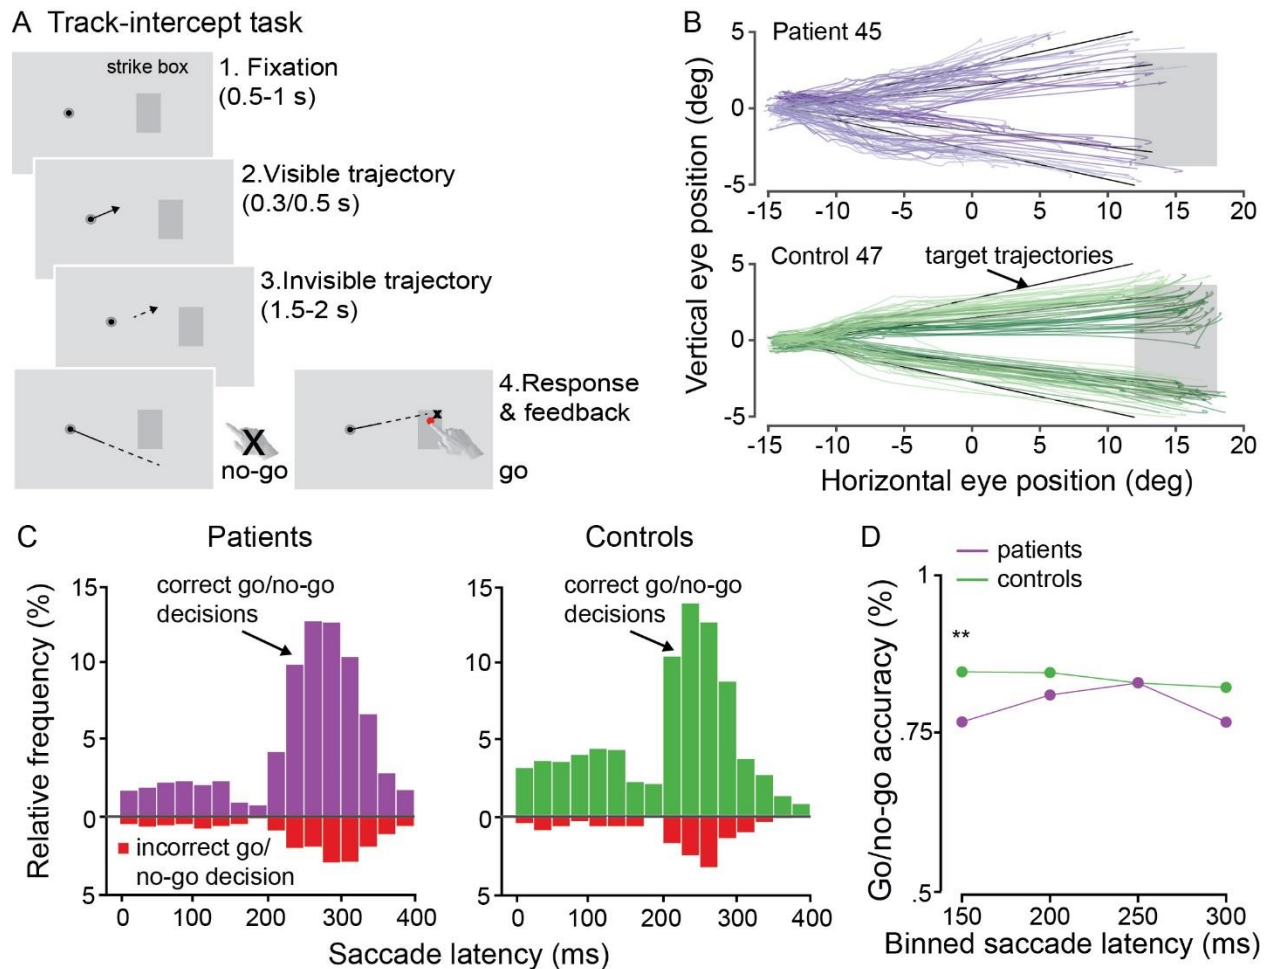

367 **Figure 6.** Sequence of events and eye movements in go/no-go track-intercept task. (A) Each trial  
368 started with a fixation period. Participants viewed a moving, disappearing target and had to judge  
369 whether the target would miss or pass a strike box. (B) 2D eye position in track-intercept task for  
370 a representative PD patient (purple) and control participant (green). (C) First catch-up saccade  
371 latency distributions (relative frequency of binned saccade latencies) for patients and controls. Red  
372 bins indicate trials in which the go/no-go decision was incorrect. (D) Go/no-go decision accuracy  
373 as a function of initial catch-up saccade latency for patients (purple) and controls (green). Circles  
374 indicate group mean for given saccade interval. Two asterisks denote significance level  $p < .01$  of  
375 ranked sum test.

### 376 Hand movement deficits are compensated during track-intercept task

377 The go/no-go track-intercept task required a decision of whether to initiate or withhold a  
378 hand movement. Following a go-decision, participants had to move their hand to the strike box



379 and intercept the moving target at the right time. A comparison of hand movement dynamics  
380 showed that patients moved their hand slower on average than controls (**Fig. 7A**). However,  
381 patients initiated their hand movement ~150 ms earlier than controls (**Table 5**). These results  
382 suggest that PD patients might have compensated for hand movement deficits, such as motor  
383 slowing, by starting the interceptive hand movement earlier than controls. Notwithstanding these  
384 differences in hand movement latency and velocity between patients and controls, both groups  
385 intercepted the target with a comparable timing error—100 ms too early on average (**Fig. 7B**)—  
386 and overshoot the target location with the same average interception error (**Table 5**). These findings  
387 show that interception timing and accuracy are preserved in PD patients despite motor slowing.

388 **Table 5.** Hand movement kinematics during track-intercept task.

|                    | PD patients     | Controls        | Two-sample unpaired <i>t</i> -tests |
|--------------------|-----------------|-----------------|-------------------------------------|
| Latency            | 712 ± 155 ms    | 868 ± 199 ms    | $t(24.5) = 2.38; p = .03; d = .88$  |
| Peak velocity      | 25.6 ± 4.7 cm/s | 32.0 ± 8.1 cm/s | $t(20.2) = 2.55; p = .02; d = .95$  |
| Interception error | 4.4 ± 1.6 deg   | 4.4 ± 1.2 deg   | $t(27.1) = 0.13; p = .90; d = .05$  |

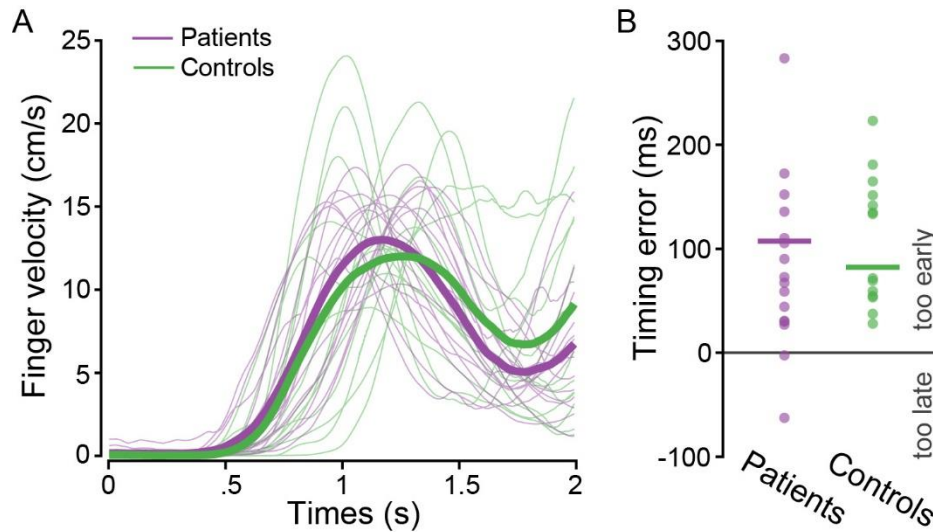

389 **Figure 7.** Hand movement dynamics in track-intercept task. (A) Hand movement velocity across  
390 time for individual (thin lines) patients (purple) and controls (green). Thick lines represent group  
391 average. (B) Interception timing error for patients and controls. Positive timing errors indicate that  
392 participants intercepted too early, negative timing error indicate late interceptions.

## Discussion

393 Oculomotor function is known to be systematically impaired in patients with Parkinson's  
394 disease. Here we argue against a general oculomotor decline and show instead that oculomotor  
395 deficits are strongly stimulus and task dependent. Our findings provide evidence for differential  
396 vulnerability for oculomotor responses to stationary vs. moving stimuli. Different pathologic  
397 disease processes might underlie functional decline in response to different types of visual  
398 stimulation. In summary, we report the following key findings.

399 Patients showed systematic impairments when making saccades to stationary targets,  
400 regardless of whether the task required reactive pro-saccades or more deliberate anti-saccades.  
401 Patients' pro-saccades were hypometric and anti-saccades went the wrong direction more  
402 frequently than for controls. In patients, pro-saccade accuracy and anti-saccade direction errors  
403 were more pronounced when saccade latencies were short, suggesting that impairments on both

404 tasks are due to common mechanisms. Overall, patients had difficulties inhibiting reactive  
405 saccades to a cued target or distractor, leaving less time to complete accurate motor planning.

406 Patients did not show impairment when tracking a moving object using a combination of  
407 smooth pursuit and saccades. Although patients made more catch-up saccades than controls during  
408 baseline pursuit, we did not observe any differences in eye position error or pursuit velocity gain.  
409 These results suggest that eye movements to moving stimuli are relatively preserved in PD.  
410 Congruently, we found that patients were able to accurately track and predict the trajectory of a  
411 moving target that disappeared after a brief viewing time. Go/no-go decision accuracy and timing  
412 were overall preserved in patients, except when they initiated a very early catch-up saccade toward  
413 the target, thereby limiting time for sensory evidence accumulation. Patients moved their hand  
414 slower than controls but were able to compensate by initiating their movements earlier, potentially  
415 indicating a learned adjustment to changes in motor function.

#### 416 Differential vulnerability to stationary vs. dynamic visual stimulation

417 In recent years, saccade tasks have become a useful clinical tool to investigate the control  
418 and inhibition of eye movements towards visual stimuli in psychiatric and neurological patient  
419 populations (Everling and Fischer, 1998; Hutton and Ettinger, 2006; Patel et al., 2019). In PD,  
420 saccades toward stationary (visual or remembered) targets are hypometric (Rottach et al., 1996;  
421 Gurvich et al., 2007; Helmchen et al., 2012), presumably due to excessive SC inhibition (Terao et  
422 al., 2011). In anti-saccade tasks, patients make more incorrect saccades toward the distractor and  
423 exhibit a higher saccade latency than controls (Briand et al, 1999; Chan et al., 2005; Amador et  
424 al., 2006; for a review, see Waldthaler et al., 2020). Our study adds to these findings by showing  
425 that task-specific errors (hypometric pro-saccades, incorrect anti-saccades) occurred  
426 predominantly in short-latency saccades. We interpret this finding as evidence of incomplete motor

427 planning: if a saccade is made early, there is less time for accurate direction and endpoint planning  
428 (Viviani & Swensson, 1982; Findlay, 1983; Cameron et al., 2012). Both the increase in error rate  
429 in the anti-saccade task and the increase in express saccades during the pro-saccade task suggest  
430 that PD patients demonstrate decreased inhibitory control (see also Ouerfelli-Ethier et al., 2018 for  
431 across-task dependencies). Deficits in inhibitory control might not only be related to impairments  
432 in oculomotor pathways but could also be the consequence of adaptive motor control. To  
433 counteract slow movement initiation (commonly observed in PD patients) the oculomotor system  
434 might reduce baseline response inhibition (Chan et al., 2005). Here we show that PD patients  
435 were, in fact, able to initiate an interceptive hand movement towards a moving target earlier than  
436 controls. These findings suggest long-term adaptive mechanisms that could be related to an altered  
437 baseline response inhibition.

438         An impairment of movement towards stationary targets is also observed during reaching.  
439 Whereas PD patients exhibited bradykinesia when reaching for a stationary object, they moved as  
440 fast as controls and with comparable accuracy when reaching for a moving object (Majsak et al.,  
441 1998; 2008). These studies highlight the importance of movement requirements and time  
442 constraints. Whereas reaches to stationary objects required a fast but self-determined movement,  
443 dynamic objects rolled rapidly toward a contact zone, providing an external cue for urgent reaches.  
444 The authors conclude that internally-regulated movements are more impaired in PD patients than  
445 externally-stimulated movements. Accordingly, PD patients showed similar eye and hand  
446 movements as controls during our track-intercept task which required urgent interceptive  
447 movements toward a designated strike zone. The task incorporated an external movement cue (the  
448 strike zone) and visual performance feedback—additional factors that might have facilitated  
449 preservation of function. Eye movements were also preserved in our baseline pursuit task, which

450 required no urgency or deliberation similar to previous studies that tested simple ramp-pursuit  
451 tasks (Fukushima et al., 2013; 2015). These findings indicate that providing external stimulation—  
452 either through a task-evoked sense of urgency and temporal movement cues or through continuous  
453 stimulus presentation—is associated with preservation of eye and hand movements function in PD  
454 patients.

#### 455 Is sensorimotor prediction impaired in PD patients?

456         When interacting with moving objects, it is critical to accurately predict the sensory  
457 outcome of visual events (Fiehler et al., 2019). We tested participants in two tasks involving  
458 moving stimuli that required different levels of prediction. In the baseline pursuit task participants  
459 tracked a moving target that moved continuously and predictably. In the track-intercept task  
460 participants had to extrapolate the target’s trajectory after it had disappeared, requiring deliberate  
461 eye movements and interception at a predicted location. In both tasks, we found relative  
462 preservation of pursuit velocity and position error as well as preserved predictive ability to guide  
463 an interceptive hand movement.

464         By contrast, smooth pursuit had been shown to be impaired in task conditions that required  
465 integrating cue information or anticipation. When remembering the meaning of two consecutive  
466 cues, one direction cue and one go/no-go cue, PD patients tended to track the target using saccades  
467 rather than following it smoothly (Fukushima et al., 2013; 2015). Internally-generated or predictive  
468 movements were also impaired in studies using anticipatory pursuit in response to a target direction  
469 reversal (de Hemptinne et al., 2013) or target blanking (Helmchen et al., 2012), or when testing  
470 the accuracy of manually controlling a randomly moving target by using a joystick (Chen et al.,  
471 2016). These studies provide converging evidence that PD patients lose the ability to move in  
472 anticipation of a future visual event when tasks require concentration and effort but no implied

473 urgency to move. In contrast, the combination of an externally-provided end location and a time-  
474 critical movement constraint (Majsak et al., 1998; 2008; Fooker & Spering, 2019; 2020) can  
475 facilitate the preservation of predictive abilities in PD patients.

#### 476 Brain networks underlying differential impairments in PD patients

477 Different levels of functional impairments in response to different types of visual  
478 stimulation have also been observed in healthy aging. For example, a study investigating motion  
479 perception in a large sample of healthy adults across the lifespan (Billino et al., 2008) found  
480 preserved ability to perceive complex motion patterns (biological motion and radial motion) as  
481 compared to simpler ones (translational motion). The authors speculate that motion stimuli with  
482 high ecological relevance (e.g., expanding radial flow might induce a fight or flight response)  
483 might be processed more efficiently, and potentially by a set of functional pathways that bypass  
484 primary visual cortex. Studies that found dissociations between motion perception and smooth  
485 pursuit eye movements have similarly argued that the pursuit system could be aided by a separate  
486 subcortical pathway that forms a direct connection from the retina to SC and brainstem (Spering  
487 & Carrasco, 2015).

488 Stimulus-dependent preservation and impairments of movements in PD is in accordance  
489 with the idea of different functional pathways. Dysfunction of the fronto-basal ganglia network  
490 might be linked to impaired inhibitory control of action planning and deliberation (Alexander &  
491 Cruther, 1990; Aron et al., 2007; Brown et al., 2004; Lalo et al., 2008; Mink, 1996; Wiecki &  
492 Frank, 2010). Preserved fast visuomotor responses, such as manual interceptions, and visually-  
493 guided eye movements might be associated with SC-brainstem loops (Corneil and Munoz, 2014)  
494 and the tecto-reticulo-spinal pathway (Gu et al., 2016). Preservation of oculomotor function in PD  
495 could also be mediated by a direct pathway, bypassing dopaminergic connections through the basal

496 ganglia (Basso, Pokorny, & Liu, 2005) or a hyperdirect pathway linking cortical eye movement  
497 areas to the subthalamic nucleus of the basal ganglia, (Nambu et al., 2002; Sieger et al., 2013). The  
498 subthalamic nucleus is involved in pursuit and saccadic eye movement control and is a target area  
499 for deep brain stimulation in PD patients (FitzGerald & Antoniadis, 2016; Lee et al., 2019).

500 Movement preservation and impairment in response to different types of stimuli and  
501 temporal task constraints might also be related task motivation. Previous research has linked  
502 bradykinesia in PD to a lack of movement motivation (Mazzoni et al., 2007). When patients were  
503 given feedback about their movement speed, they were able to point to a stationary target as fast  
504 and accurately as age-matched control. However, PD patients implicitly chose to move at a slower  
505 speed compared to controls and needed more repetitions to attain the desired number of valid  
506 (sufficiently fast) trials. The authors propose that impaired movement motivation is linked to  
507 dopaminergic projections from the midbrain to the striatum (Mazzoni et al., 2007; Niv et al., 2007;  
508 Schultz, 2007; Moustafa et al., 2008). Dopaminergic medication enhanced the ability of PD  
509 patients to anticipate error signals when continuously tracking an unpredictably moving visual  
510 target with a joystick (Chen et al., 2016), indicating that dopamine increases sensitivity to positive  
511 reinforcement learning processes (Frank et al., 2004). In our tasks, we did not find systematic  
512 effects of dopaminergic medication on any eye or hand movements. These findings are consistent  
513 with other studies showing comparable smooth pursuit eye movements in patients on and off  
514 medication (Fukushima et al., 2015; Ladda et al., 2008). A lack of medication effect on select  
515 oculomotor performance at an early stage in the disease might indicate that externally-stimulated  
516 movements (e.g., visually-guided eye movements) are less affected by a decrease of movement  
517 motivation.

518 Conclusion

519           The present study provides evidence for stimulus- and task-dependent oculomotor deficits  
520 in PD patients. Systematic impairments of saccades to stationary targets at short latencies indicate  
521 impaired inhibitory oculomotor control in PD patients. In turn, the relative preservation of visually-  
522 guided smooth pursuit, motion prediction, and fast manual interception might be mediated by  
523 separate functional pathways rather than differences in movement motivation. Our findings can  
524 inform the development of tasks that are engaging and motivating for functional training in PD  
525 patients. Furthermore, we found evidence for adaptive mechanisms in the eye (decreased inhibition  
526 to compensate increased latency) and in the hand (decreased latency to compensate decreased  
527 velocity). Such long-term sensorimotor adaptation might be related to continuous reinforcement  
528 that patients receive during everyday life.



## References

- 529 Albin RL, Young AB, Penney JB (1989) The functional anatomy of basal ganglia disorders.  
530 Trends Neurosci 12:366–375.
- 531 Alexander GE, Crutcher MD (1990) Functional architecture of basal ganglia circuits: neural  
532 substrates of parallel processing. Trends Neurosci 13:266–271.
- 533 Amador S, Hood A, Schiess M, Izor R, Sereno A (2006) Dissociating cognitive deficits involved  
534 in voluntary eye movement dysfunctions in Parkinson’s disease patients. Neuropsychologia  
535 44:1475–1482.
- 536 Armstrong RA (2008) Visual signs and symptoms of Parkinson’s disease. Clin Exp Optom  
537 91:129–138.
- 538 Armstrong RA (2015) Oculo-visual dysfunction in Parkinson’s disease. J Parkinsons Dis 5:715–  
539 726.
- 540 Aron AR, Durston S, Eagle DM, Logan GD, Stinear CM, Stuphorn V (2007) Converging  
541 evidence for a fronto-basal-ganglia network for inhibitory control of action and cognition. J  
542 Neurosci 27:11860–11864.
- 543 Basso MA, Pokorny JJ, Liu P (2005) Activity of substantia nigra pars reticulata neurons during  
544 smooth pursuit eye movements in monkeys: basal ganglia and pursuit. Eur J Neurosci  
545 22:448–464.
- 546 Bhutani N, Sureshbabu R, Farooqui AA, Behari M, Goyal V, Murthy A (2013) Queuing of  
547 concurrent movement plans by basal ganglia. J Neurosci 33:9985–9997.
- 548 Billino J, Bremmer F, Gegenfurtner KR (2008) Differential aging of motion processing  
549 mechanisms: evidence against general perceptual decline. Vis Res 48:1254–1261.
- 550 Brainard DH (1997) The Psychophysics Toolbox. Spat Vis 10:433–436.
- 551 Briand KA, Strallow D, Hening W, Poizner H, Sereno AB (1999) Control of voluntary and  
552 reflexive saccades in Parkinson’s disease. Exp Brain Res 129:38–48.
- 553 Brown JW, Bullock D, Grossberg S (2004) How laminar frontal cortex and basal ganglia circuits  
554 interact to control planned and reactive saccades. Neural Netw 17:471–510.
- 555 Cameron IGM, Pari G, Alahyane N, Brien DC, Coe BC, Stroman PW, Munoz DP (2012)  
556 Impaired executive function signals in motor brain regions in Parkinson’s disease.  
557 NeuroImage 60:1156–1170.
- 558 Chan F, Armstrong IT, Pari G, Riopelle RJ, Munoz DP (2005) Deficits in saccadic eye-  
559 movement control in Parkinson’s disease. Neuropsychologia 43:784–796.
- 560 Chen J, Ho S-L, Lee TM-C, Chang RS-K, Pang SY-Y, Li L (2016) Visuomotor control in  
561 patients with Parkinson’s disease. Neuropsychologia 80:102–114.
- 562 Corneil BD, Munoz DP (2014) Overt responses during covert orienting. Neuron 82:1230–1243.

- 563 de Hemptinne C, Ivanoiu A, Lefèvre P, Missal M (2013) How does Parkinson's disease and  
564 aging affect temporal expectation and the implicit timing of eye movements?  
565 *Neuropsychologia* 51:340–348.
- 566 De Vos M, Prince J, Buchanan T, FitzGerald JJ, Antoniadou CA (2020) Discriminating  
567 progressive supranuclear palsy from Parkinson's disease using wearable technology and  
568 machine learning. *Gait & Posture* 77:257–263.
- 569 Duysens J, Nonnekes J (2021) Parkinson's Kinesia Paradoxa is not a paradox. *Mov Disord*  
570 36:1115–1118.
- 571 Everling S, Fischer B (1998) The antisaccade: a review of basic research and clinical studies.  
572 *Neuropsychologia* 36:885–899.
- 573 Fiehler K, Brenner E, Spering M (2019) Prediction in goal-directed action. *J Vis* 19:1–21.
- 574 Findlay JM (1983) Visual information processing for saccadic eye movements. In: Spatially  
575 oriented behavior (Hein A, Jeannerod M, eds), pp 281–303. New York, NY: Springer.
- 576 Fischer B (1987) The preparation of visually guided saccades. *Rev Physiol Biochem Pharmacol*  
577 106:1–35.
- 578 FitzGerald JJ, Antoniadou CA (2016) Eye movements and deep brain stimulation. *Curr Opin*  
579 *Neurol* 29:69–73.
- 580 Fooker J, Spering M (2019) Decoding go/no-go decisions from eye movements. *J Vis* 19:1–13.
- 581 Fooker J, Spering M (2020) Eye movements as a readout of sensorimotor decision processes. *J*  
582 *Neurophysiol* 123:1439–1447.
- 583 Frank MJ, Seeberger LC, O'Reilly RC (2004) By carrot or by stick: cognitive reinforcement  
584 learning in Parkinsonism. *Science* 306:1940–1943.
- 585 Fukushima K, Fukushima J, Barnes GR (2017) Clinical application of eye movement tasks as an  
586 aid to understanding Parkinson's disease pathophysiology. *Exp Brain Res* 235:1309–1321.
- 587 Fukushima K, Ito N, Barnes GR, Onishi S, Kobayashi N, Takei H, Olley PM, Chiba S, Inoue K,  
588 Warabi T (2015) Impaired smooth pursuit in Parkinson's disease: normal cue information  
589 memory, but dysfunction of extraretinal mechanisms for pursuit preparation and execution.  
590 *Physiol Rep* 3:1–17.
- 591 Glickstein M, Stein J (1991) Paradoxical movement in Parkinson's disease. *Trends Neurosci*  
592 14:480–482.
- 593 Goetz CG, Poewe W, Rascol O, Sampaio C, Stebbins GT, Counsell C, Giladi N, Holloway RG,  
594 Moore CG, Wenning GK, Yahr MD. (2004) Movement Disorder Society Task Force report  
595 on the Hoehn and Yahr staging scale: Status and recommendations the Movement Disorder  
596 Society Task Force on rating scales for Parkinson's disease. *Mov Disord* 19:1020-1028.
- 597 Gu C, Wood DK, Gribble PL, Corneil BD (2016) A trial-by-trial window into sensorimotor  
598 transformations in the human motor periphery. *J Neurosci* 36:8273–8282.

- 599 Gurvich C, Georgiou-Karistianis N, Fitzgerald PB, Millist L, White OB (2007) Inhibitory control  
600 and spatial working memory in Parkinson's disease. *Mov Disord* 22:1444–1450.
- 601 Helmchen C, Pohlmann J, Trillenber P, Lencer R, Graf J, Sprenger A (2012) Role of  
602 anticipation and prediction in smooth pursuit eye movement control in Parkinson's disease.  
603 *Mov Disord* 27:1012–1018.
- 604 Hikosaka O, Takikawa Y, Kawagoe R (2000) Role of the basal ganglia in the control of  
605 purposive saccadic eye movements. *Physiol Rev* 80:953–978.
- 606 Hutton SB, Ettinger U (2006) The antisaccade task as a research tool in psychopathology: a  
607 critical review. *J Psychophysiol* 43:302–313.
- 608 Jenkinson N, Brown P (2011) New insights into the relationship between dopamine, beta  
609 oscillations and motor function. *Trends Neurosci* 34:611–618.
- 610 Kleiner M, Brainard D, Pelli D, Ingling A, Murray R, Broussard C (2007) What's new in  
611 Psychtoolbox-3? *Percept* 36:1-16.
- 612 Ladda J, Valkovič P, Eggert T, Straube A (2008) Parkinsonian patients show impaired predictive  
613 smooth pursuit. *J Neurol* 255:1071–1078.
- 614 Lalo E, Thobois S, Sharott A, Polo G, Mertens P, Pogosyan A, Brown P (2008) Patterns of  
615 bidirectional communication between cortex and basal ganglia during movement in patients  
616 with Parkinson disease. *J Neurosci* 28:3008–3016.
- 617 Lee S, Liu A, Wang ZJ, McKeown MJ (2019) Abnormal phase coupling in Parkinson's disease  
618 and normalization effects of subthreshold vestibular stimulation. *Front Hum Neurosci*  
619 13:118.
- 620 Leigh RJ, Zee DS (2015) *The neurology of eye movements*. Oxford, UK: Oxford University  
621 Press.
- 622 Majsak MJ, Kaminski T, Gentile AM, Flanagan JR (1998) The reaching movements of patients  
623 with Parkinson's disease under self-determined maximal speed and visually cued  
624 conditions. *Brain* 121:755–766.
- 625 Majsak MJ, Kaminski T, Gentile AM, Gordon AM (2008) Effects of a moving target versus a  
626 temporal constraint on reach and grasp in patients with Parkinson's disease. *Exp Neurol*  
627 210:479–488.
- 628 Marx S, Respondek G, Stamelou M, Dowiasch S, Stoll J, Bremmer F, Oertel WH, Höglinger  
629 GU, Einhäuser W (2012) Validation of mobile eye-tracking as novel and efficient means for  
630 differentiating progressive supranuclear palsy from Parkinson's disease. *Front Behav*  
631 *Neurosci* 6:1–11
- 632 Mazzoni P, Hristova A, Krakauer JW (2007) Why don't we move faster? Parkinson's disease,  
633 movement vigor, and implicit motivation. *J Neurosci* 27:7105–7116.
- 634 Nambu A, Tokuno H, Takada M (2002) Functional significance of the cortico–subthalamo–  
635 pallidal 'hyperdirect' pathway. *Neurosci Res* 43:111–117.

- 636 McNab F, Klingberg T (2008) Prefrontal cortex and basal ganglia control access to working  
637 memory. *Nat Neurosci* 11:103–107.
- 638 Merritt KE, Seergobin KN, Mendonça DA, Jenkins ME, Goodale MA, MacDonald PA (2017)  
639 Automatic online motor control is intact in Parkinson’s disease with and without perceptual  
640 awareness. *eNeuro* 4:1–12.
- 641 Mink JW (1996) The basal ganglia: focused selection and inhibition of competing motor  
642 programs. *Prog Neurobiol* 50:381–425.
- 643 Moustafa AA, Cohen MX, Sherman SJ, Frank MJ (2008) A role for dopamine in temporal  
644 decision making and reward maximization in Parkinsonism. *J Neurosci* 28:12294–12304.
- 645 Munoz DP, Everling S (2004) Look away: the anti-saccade task and the voluntary control of eye  
646 movement. *Nat Rev Neurosci* 5:218–228.
- 647 Niv Y, Daw ND, Joel D, Dayan P (2007) Tonic dopamine: opportunity costs and the control of  
648 response vigor. *Psychopharmacol* 191:507–520.
- 649 Noorani I, Carpenter RHS (2014) Basal ganglia: racing to say no. *Trends Neurosci* 37:467–469.
- 650 Ouerfelli-Ethier J, Elsaied B, Desgroseilliers J, Munoz DP, Blohm G, Khan AZ (2018) Anti-  
651 saccades predict cognitive functions in older adults and patients with Parkinson’s disease.  
652 *PLoS ONE* 13:1–20.
- 653 Patel S, Fitzgerald JJ, Antoniadou CA (2019) Oculomotor effects of medical and surgical  
654 treatments of Parkinson’s disease. *Prog Brain Res* 249:297–305.
- 655 Pelli DG (1997) The VideoToolbox software for visual psychophysics: transforming numbers  
656 into movies. *Spat Vis* 10:437–442.
- 657 Perugini A, Ditterich J, Basso MA (2016) Patients with Parkinson’s disease show impaired use  
658 of priors in conditions of sensory uncertainty. *Curr Biol* 26:1902–1910.
- 659 Perugini A, Ditterich J, Shaikh AG, Knowlton BJ, Basso MA (2018) Paradoxical decision-  
660 making: A framework for understanding cognition in Parkinson’s disease. *Trends Neurosci*  
661 41:512–525.
- 662 R Core Team (2017) R: A language and environment for statistical computing. Vienna, Austria:  
663 R Foundation for Statistical Computing.
- 664 Rottach KG, Riley DE, DiScenna AO, Zivotofsky AZ, Leigh RJ (1996) Dynamic properties of  
665 horizontal and vertical eye movements in parkinsonian syndromes. *Ann Neurol* 39:368–377.
- 666 Schultz W (2007) Multiple dopamine functions at different time courses. *Annu Rev Neurosci*  
667 30:259–288.
- 668 Sieger T, Bonnet C, Serranová T, Wild J, Novák D, Růžička F, Urgošík D, Růžička E, Gaymard  
669 B, Jech R (2013) Basal ganglia neuronal activity during scanning eye movements in  
670 Parkinson’s disease. *PLoS ONE* 8:1–11.
- 671 Spring M, Carrasco M (2015) Acting without seeing: eye movements reveal visual processing  
672 without awareness. *Trends Neurosci* 38:247–258.

- 673 Terao Y, Fukuda H, Yugeta A, Hikosaka O, Nomura Y, Segawa M, Hanajima R, Tsuji S, Ugawa  
674 Y (2011) Initiation and inhibitory control of saccades with the progression of Parkinson's  
675 disease – changes in three major drives converging on the superior colliculus.  
676 *Neuropsychologia* 49:1794–1806.
- 677 Thura D, Cisek P (2017) The basal ganglia do not select reach targets but control the urgency of  
678 commitment. *Neuron* 95:1160–1170.
- 679 Viviani P, Swensson RG (1982) Saccadic eye movements to peripherally discriminated visual  
680 targets. *J Exp Psychol Hum Percept Perf* 8:113–126.
- 681 Waldthaler J, Stock L, Student J, Sommerkorn J, Dowiasch S, Timmermann L (2021)  
682 Antisaccades in Parkinson's disease: a meta-analysis. *Neuropsychol Rev* online ahead of  
683 print, doi: 10.1007/s11065-021-09489-1.
- 684 Wiecki TV, Frank MJ (2010) Neurocomputational models of motor and cognitive deficits in  
685 Parkinson's disease. *Prog Brain Res* 183:275–297.
- 686 Zokaei N, Gillebert CR, Chauvin JJ, Gresch D, Board AG, Rolinski M, Hu MT, Nobre AC  
687 (2021) Temporal orienting in Parkinson's disease. *Eur J Neurosci* 53:2713–2725.
